# Supplementary material
Source: MDPI journal article supplement (https://www.mdpi.com/1424-8247/16/10/1380)
Supplement: s1 [file s1]

# First-Row Transition 7-Oxo-5-phenyl-1,2,4-triazolo[1,5-a]pyrimidine Metal Complexes: Antiparasitic Activity and Release Studies

Álvaro Martín-Montes <sup>1,†</sup>, Sandra Jimenez-Falcao <sup>2,†</sup>, Santiago Gómez-Ruiz <sup>3</sup>, Clotilde Marín <sup>1,\*</sup> and José M. Mendez-Arriaga <sup>3,\*</sup>

## Supplementary Information

### 1. UV SPECTRA

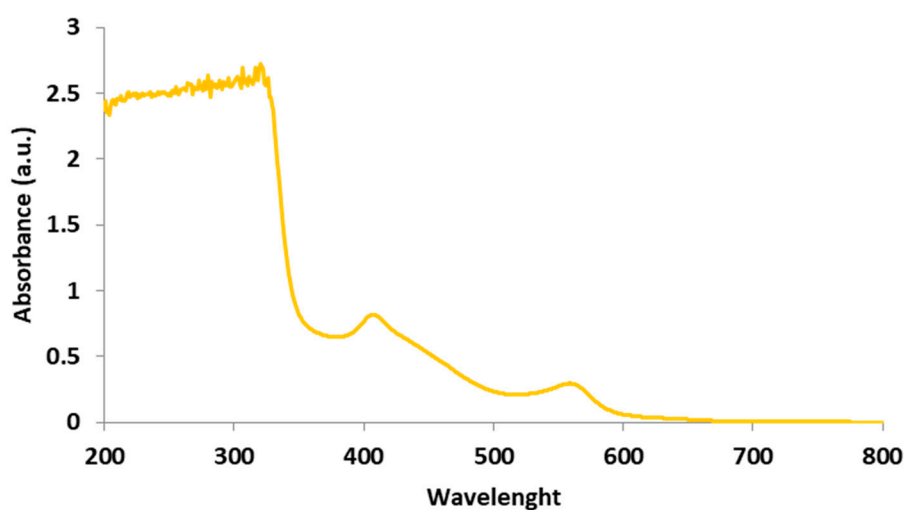

Figure S1. UV spectra complex 2 in MTL medium.

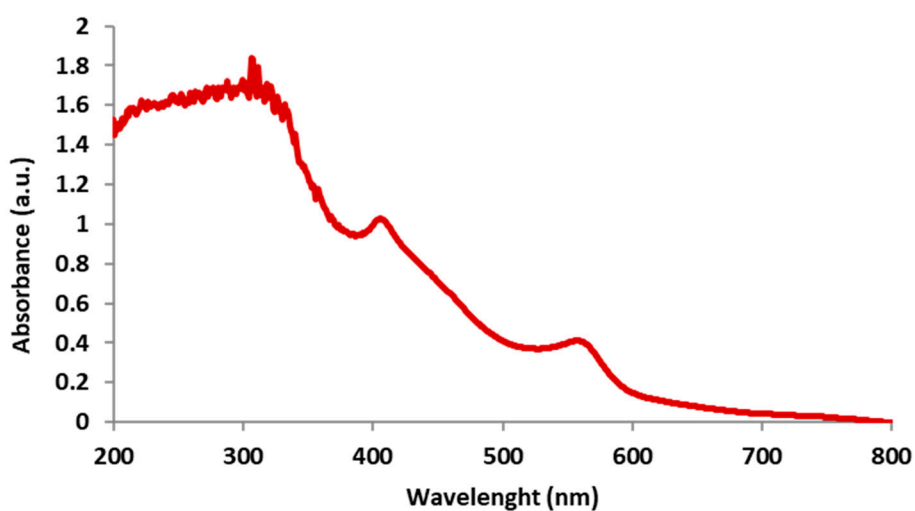

Figure S2. UV spectra complex 3 in MTL medium.

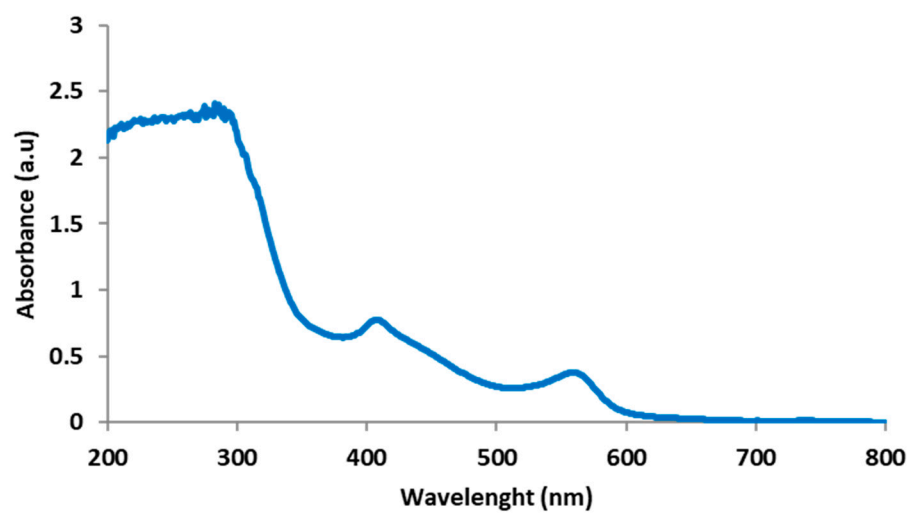

**Figure S3.** UV spectra complex 4 in MTL medium.
